# Supplementary material for: High Dimensionality Reduction and Immune Phenotyping of Natural Killer and Invariant Natural Killer Cells in Latent Tuberculosis-Diabetes Comorbidity
Source: PubMed Central journal article supplement (PMC8886750; doi:10.1155/2022/2422790), 2022-02-21

# Supplementary Figure 1

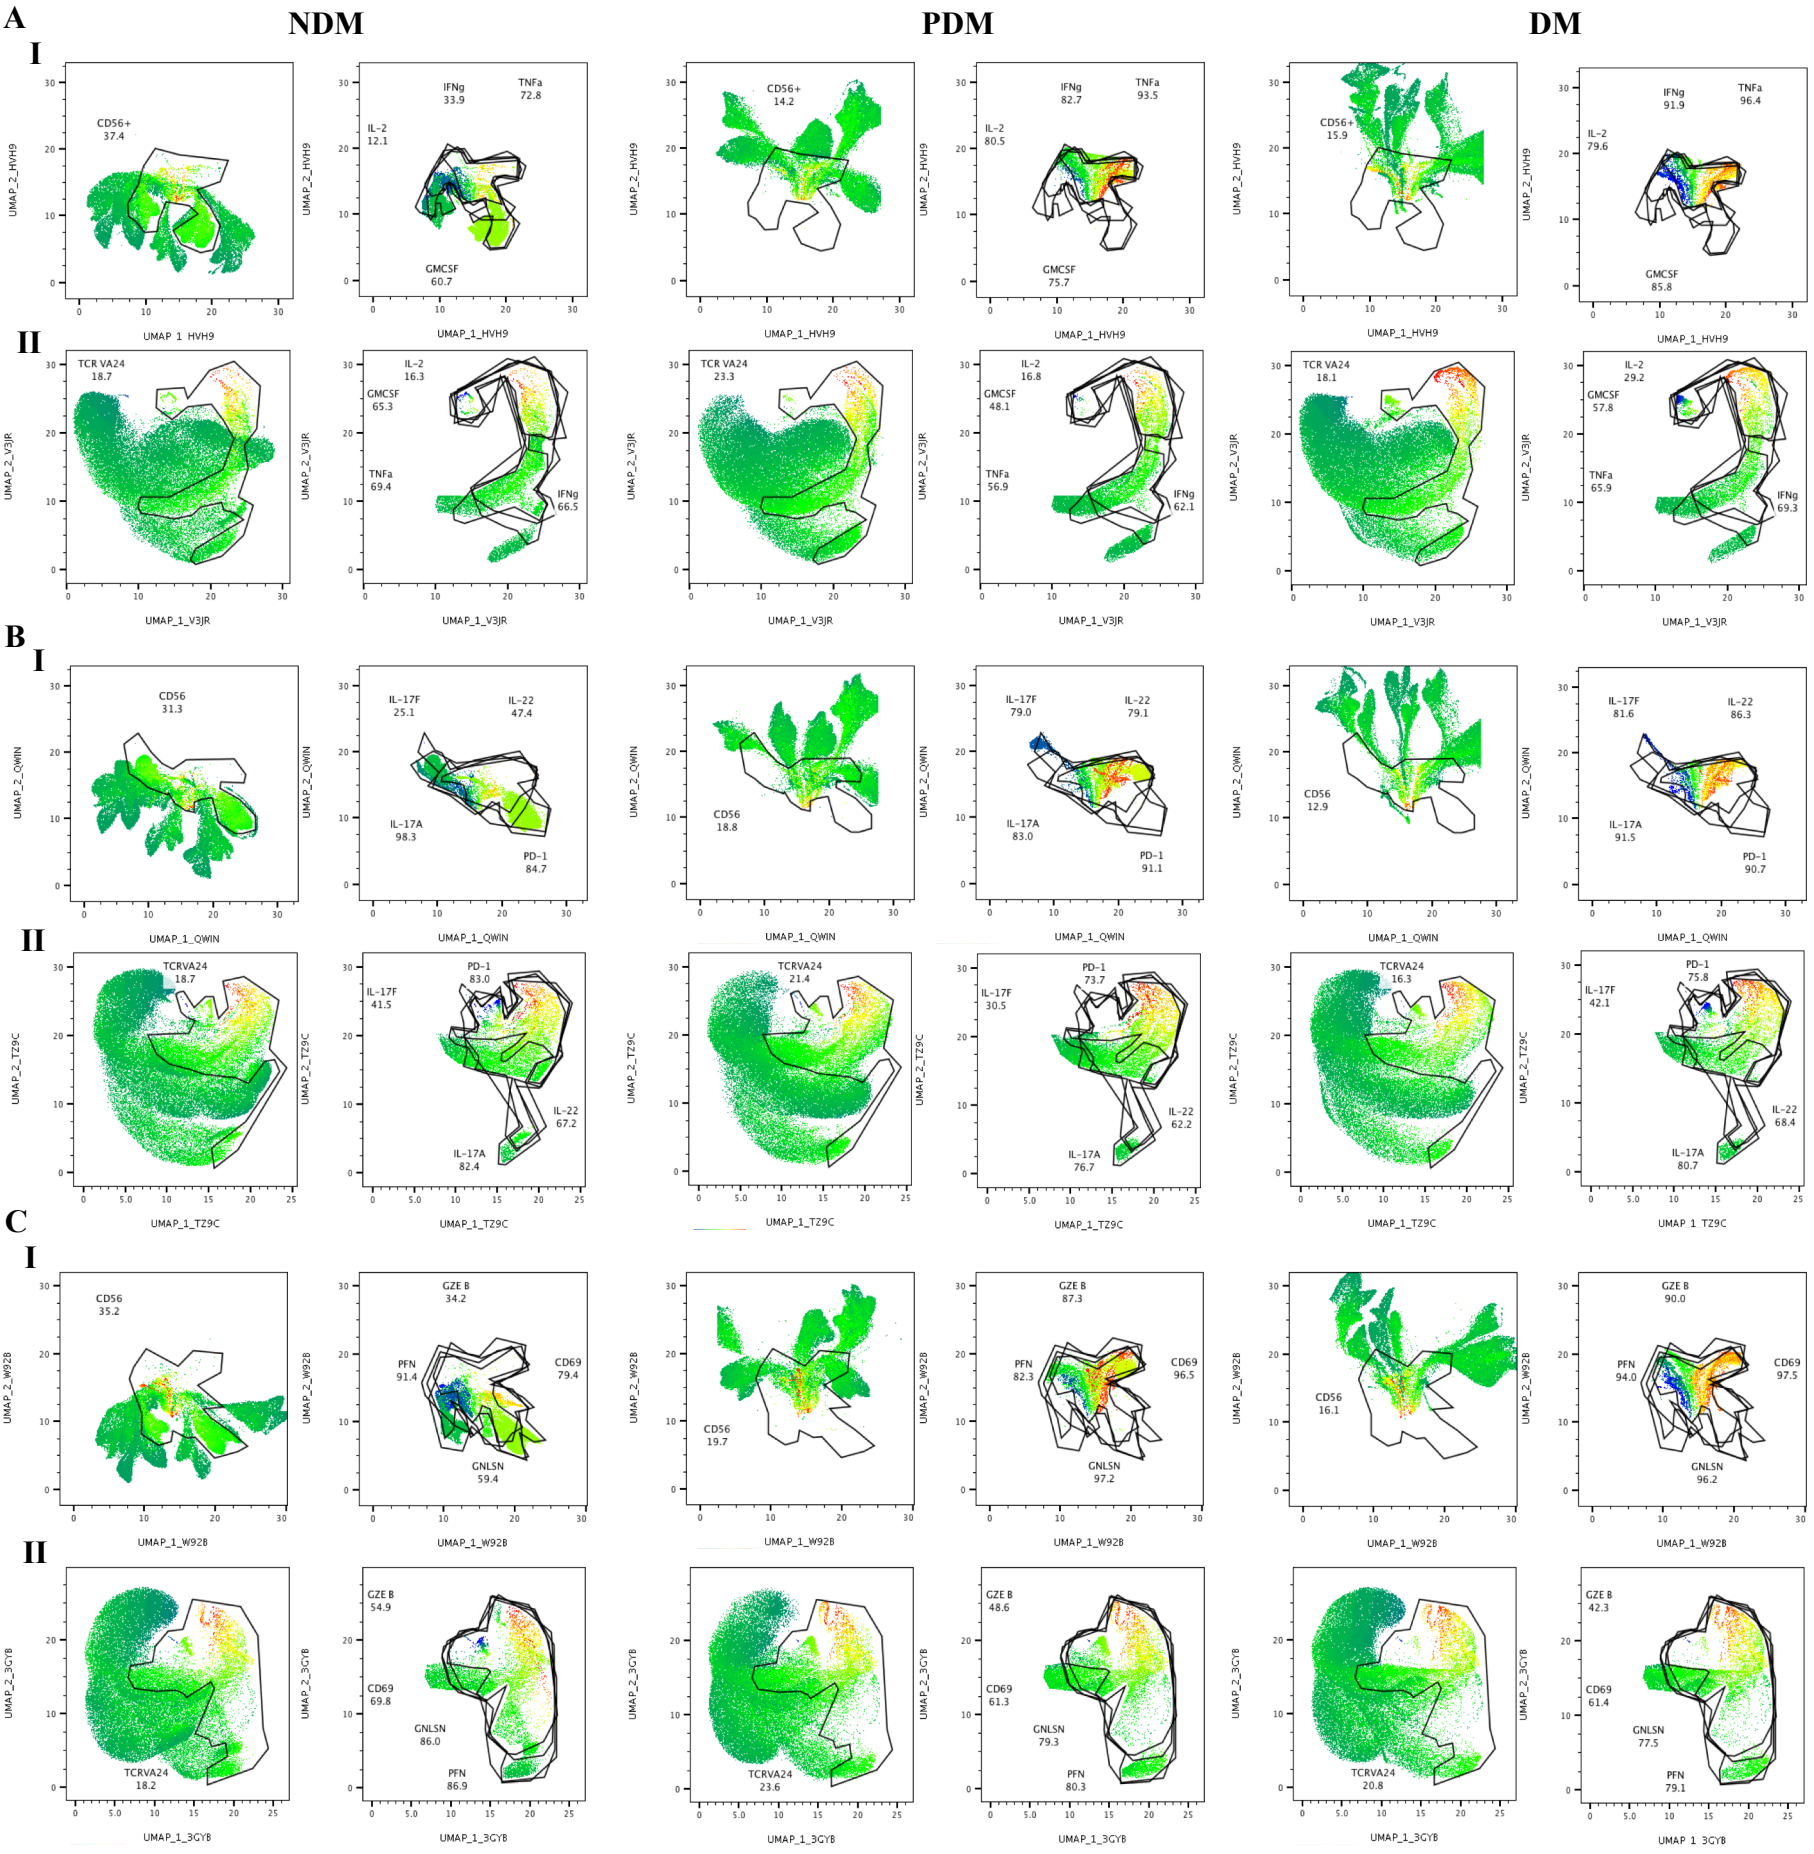

Supplement: 2422790.f1.pdf [file 2422790.f1.pdf]
