# Supplementary material for: High Dimensionality Reduction and Immune Phenotyping of Natural Killer and Invariant Natural Killer Cells in Latent Tuberculosis-Diabetes Comorbidity
Source: PubMed Central journal article supplement (PMC8886750; doi:10.1155/2022/2422790), 2022-02-21

# Supplementary Figure 3

**A**

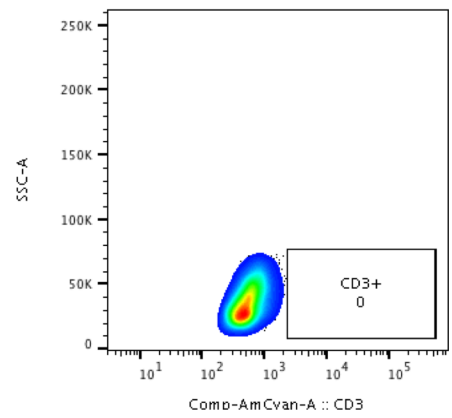

**B**

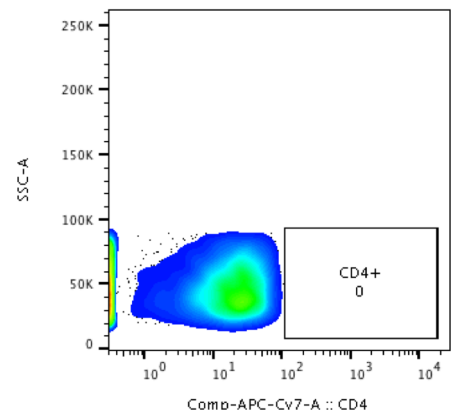

**C**

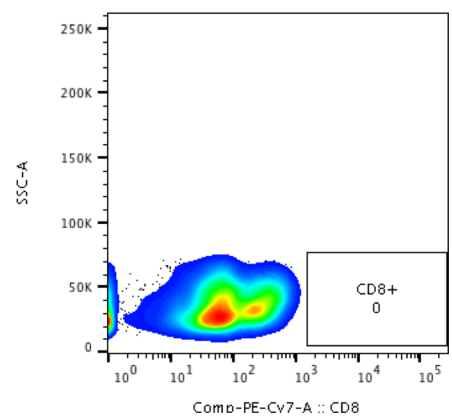

**D**

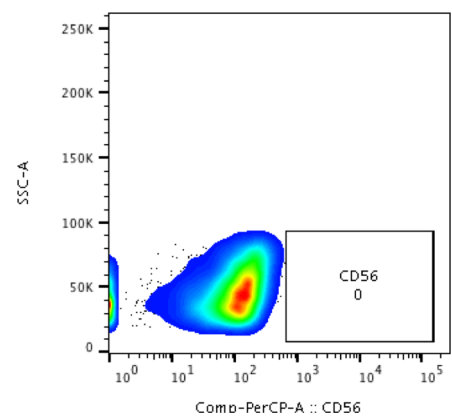

Supplement: 2422790.f3.pdf [file 2422790.f3.pdf]
